# Supplementary material for: Choice of implant combinations in total hip replacement: systematic review and network meta-analysis
Source: PubMed Central journal article supplement (PMC5683044; doi:10.1136/bmj.j4651), 2017-10-31
Supplement: lopj039521.ww1.pdf [file lopj039521.ww1.pdf]

## Appendix 1: Possible combinations of bearing surfaces, head sizes and fixation

| <b>Femoral head-on-acetabular surface bearing combination</b> | <b>Head size</b>         | <b>Fixation</b>                            |
|---------------------------------------------------------------|--------------------------|--------------------------------------------|
| Ceramic-on-ceramic (CoC)                                      | Large $\geq 36\text{mm}$ | With cement                                |
|                                                               | Small $< 36\text{mm}$    | Without cement<br>Hybrid<br>Reverse hybrid |
| Metal-on-metal (MoM)                                          | Large $\geq 36\text{mm}$ | With cement                                |
|                                                               | Small $< 36\text{mm}$    | Without cement<br>Hybrid<br>Reverse hybrid |
| Metal-on-polyethylene (MoP, not HCL)                          | Large $\geq 36\text{mm}$ | With cement                                |
|                                                               | Small $< 36\text{mm}$    | Without cement<br>Hybrid<br>Reverse hybrid |
| Metal-on-polyethylene (MoP, HCL)                              | Large $\geq 36\text{mm}$ | With cement                                |
|                                                               | Small $< 36\text{mm}$    | Without cement<br>Hybrid<br>Reverse hybrid |
| Ceramic-on-polyethylene (CoP, not HCL)                        | Large $\geq 36\text{mm}$ | With cement                                |
|                                                               | Small $< 36\text{mm}$    | Without cement<br>Hybrid<br>Reverse hybrid |
| Ceramic-on-polyethylene (CoP, HCL)                            | Large $\geq 36\text{mm}$ | With cement                                |
|                                                               | Small $< 36\text{mm}$    | Without cement<br>Hybrid<br>Reverse hybrid |
| Metal-on-metal resurfacing                                    | Large                    |                                            |

HCL: highly cross-linked
