# Supplementary material for: Choice of implant combinations in total hip replacement: systematic review and network meta-analysis
Source: PubMed Central journal article supplement (PMC5683044; doi:10.1136/bmj.j4651), 2017-10-31
Supplement: lopj039521.ww3.pdf [file lopj039521.ww3.pdf]

## Appendix 3: Additional details of the random walk model

### A. Data structure

| Study                | No. Arms | Time points (in months) |
|----------------------|----------|-------------------------|
| Bjorgul (2013)       | 3        | 24, 60, 84              |
| D'Antonio (2002)     | 2        | 33                      |
| Digas (2003)         | 2        | 24, 36, 60, 120         |
| Howie (2005)         | 2        | 60, 100                 |
| Morison (2014)       | 4        | 60                      |
| Hamilton (2010)      | 2        | 30                      |
| Kadar (2011)         | 4        | 12, 24, 60              |
| Ochs (2007)          | 2        | 3,101                   |
| Pabinger (2003)      | 2        | 7, 24                   |
| Bal (2005)           | 2        | 24                      |
| Bascarevic (2010)    | 2        | 50                      |
| Beaupre (2013)       | 2        | 12, 60, 120             |
| Desmarchelier (2013) | 2        | 60, 98                  |
| Jassim (2015)        | 3        | 60                      |
| Girard (2006)        | 2        | 54, 93                  |

### B. Modelling details

We used a binomial likelihood and a logistic link function to model the number of revisions in the  $j^{\text{th}}$  observed time period of the  $k^{\text{th}}$  arm or the  $i^{\text{th}}$  study:

$$r_{ikj} \sim \text{Binomial}(p_{ikj}, n_{ikj})$$

$p_{ikj}$  is the probability of revision; and  $n_{ikj}$  is the number of hips at risk at the start of observation period  $j$ .

The probability of revision  $p_{ikj}$  is defined by the exposure of the hips in each of the two time periods:

$$p_{ikj} = 1 - e^{-\theta_{ikj}}$$

As the time period for observation  $j$  may not match the time periods of the model (0-2 and 2-10 years), we split the contribution to the total hazard between the model time periods:

$$\theta_{ikj} = \lambda_{ik}^{0-2} E_{ikj}^{0-2} + \lambda_{ik}^{2-10} E_{ikj}^{2-10},$$

where  $E_{ikj}^{0-2}$  is exposure of observation  $j$  in 0-2 years;  $E_{ikj}^{2-10}$  is exposure of observation  $j$  in 2-10 years; and  $\lambda_{ik}^{0-2}$  and  $\lambda_{ik}^{2-10}$  are the hazards in these two time periods.

Log hazard ratios (treatment effects) in  $x = 0 - 2$  and  $x = 2 - 10$  years in study  $i$  and arm  $k$  were modelled as

$$\log(\lambda_{ik}^x) = \mu_{it} + d_{tik}^x.$$

The random walk model assumes treatment effects for implant  $t$  in period 2-10 were assumed normally distributed around effects in 0-2 years with between time period variance  $\sigma_d$  shared across implants:

$$d_t^{2-10} \sim N(d_t^{0-2}, \sigma_d)$$

More complex structural assumptions would not be identifiable as there are only two time periods. Vague prior distributions were assumed for treatment effects in period 0-2 years:

$$d_t^{0-2} \sim N(0, \sigma = \sqrt{1000})$$

We also ran several sensitivity analyses where we modelled the treatment effects as

$$\log(\lambda_{ik}^x) = \mu_{it} + d_{tik}^{0-2} + \varphi_{tk}^x$$

where  $\varphi_{tk}^{0-2} = 0$ , and we explored three different parameterisations for  $\varphi_{tk}^{2-10}$ , namely

$\varphi_{tk}^{2-10} = 0$ ,  $\varphi_{tk}^{2-10} = f$  and  $\varphi_{tk}^{2-10} \sim N(f, \sigma_\varphi)$ , with vague priors  $f \sim N(0, \sqrt{1000})$  and  $\sigma_\varphi \sim U(0,5)$ .

The results showed the same trends but with greater precision, although the heterogeneity increased and DIC statistics supported our base case model.
