# Supplementary material for: Choice of implant combinations in total hip replacement: systematic review and network meta-analysis
Source: PubMed Central journal article supplement (PMC5683044; doi:10.1136/bmj.j4651), 2017-10-31
Supplement: lopj039521.ww5.pdf [file lopj039521.ww5.pdf]

## Appendix 5: Risk of bias assessments in included studies

| Study                          | <b>Selection bias</b><br>Random sequence generation | <b>Selection bias</b><br>Allocation concealment | <b>Performance bias</b><br>Blinding of participants | <b>Detection bias</b><br>Blinding of primary outcome assessors | <b>Attrition bias</b><br>Incomplete primary outcome data | <b>Reporting bias</b><br>Selective reporting | <b>Other sources of bias</b><br>Funding, baseline characteristics of trial arms | <b>Overall rating</b> | <b>Key reasons for study considered at high risk of bias</b>                                                                                                                        |
|--------------------------------|-----------------------------------------------------|-------------------------------------------------|-----------------------------------------------------|----------------------------------------------------------------|----------------------------------------------------------|----------------------------------------------|---------------------------------------------------------------------------------|-----------------------|-------------------------------------------------------------------------------------------------------------------------------------------------------------------------------------|
| Amanatullah et al. 2011 (1, 2) | +                                                   | +                                               | ?                                                   | +                                                              | -                                                        | ?                                            | ?                                                                               | -                     | 38% loss to follow up. Randomisation using sealed envelopes gave odd numbers: 196, 161.                                                                                             |
| Ando et al. 2015 (3)           | +                                                   | +                                               | ?                                                   | ?                                                              | -                                                        | +                                            | +                                                                               | -                     | Only information on patients followed up at 2 years for metal ion levels - no information on reasons patients did not attend for follow up. These could have been implant failures. |
| Ayers et al. 2009 (4)          | ?                                                   | ?                                               | ?                                                   | ?                                                              | +                                                        | +                                            | +                                                                               | ?                     |                                                                                                                                                                                     |
| Bal et al. 2005 (5-7)          | +                                                   | +                                               | ?                                                   | ?                                                              | +                                                        | +                                            | ?                                                                               | ?                     |                                                                                                                                                                                     |
| Bascarevic et al, 2010 (8)     | +                                                   | ?                                               | ?                                                   | ?                                                              | +                                                        | +                                            | ?                                                                               | ?                     |                                                                                                                                                                                     |
| Beaupre et al. 2013 (9, 10)    | +                                                   | +                                               | ?                                                   | ?                                                              | ?                                                        | +                                            | +                                                                               | ?                     |                                                                                                                                                                                     |
| Bjorgul et al. 2013 (11)       | +                                                   | +                                               | +                                                   | ?                                                              | +                                                        | +                                            | +                                                                               | +                     |                                                                                                                                                                                     |
| Brodner et al. 2003 (12, 13)   | ?                                                   | ?                                               | ?                                                   | ?                                                              | ?                                                        | ?                                            | +                                                                               | ?                     |                                                                                                                                                                                     |
| Calvert et al. 2009 (14)       | +                                                   | +                                               | +                                                   | +                                                              | ?                                                        | +                                            | ?                                                                               | ?                     |                                                                                                                                                                                     |
| D'Antonio et al. 2002 (15-26)  | +                                                   | ?                                               | +                                                   | ?                                                              | +                                                        | +                                            | ?                                                                               | +                     |                                                                                                                                                                                     |
| Dahlstrand et al. 2009 (27)    | +                                                   | ?                                               | ?                                                   | +                                                              | +                                                        | +                                            | +                                                                               | +                     |                                                                                                                                                                                     |
| Desmarchelier et al. 2013 (28) | ?                                                   | ?                                               | ?                                                   | ?                                                              | +                                                        | +                                            | +                                                                               | ?                     |                                                                                                                                                                                     |
| Digas et al. 2003 (29-33)      | ?                                                   | ?                                               | ?                                                   | ?                                                              | +                                                        | ?                                            | +                                                                               | ?                     |                                                                                                                                                                                     |



| Study                       | <b>Selection bias</b><br>Random sequence generation | <b>Selection bias</b><br>Allocation concealment | <b>Performance bias</b><br>Blinding of participants | <b>Detection bias</b><br>Blinding of primary outcome assessors | <b>Attrition bias</b><br>Incomplete primary outcome data | <b>Reporting bias</b><br>Selective reporting | <b>Other sources of bias</b><br>Funding, baseline characteristics of trial arms | <b>Overall rating</b> | <b>Key reasons for study considered at high risk of bias</b>                                                                                                                              |
|-----------------------------|-----------------------------------------------------|-------------------------------------------------|-----------------------------------------------------|----------------------------------------------------------------|----------------------------------------------------------|----------------------------------------------|---------------------------------------------------------------------------------|-----------------------|-------------------------------------------------------------------------------------------------------------------------------------------------------------------------------------------|
| Grubl et al. 2006 (63)      | +                                                   | +                                               | +                                                   | ?                                                              | +                                                        | +                                            | ?                                                                               | ?                     |                                                                                                                                                                                           |
| Haddad et al. 2015 (64, 65) | ?                                                   | +                                               | ?                                                   | +                                                              | ?                                                        | +                                            | -                                                                               | -                     | Only 24 out of 80 patients whose outcomes were reported were randomised.                                                                                                                  |
| Hailer et al. 2011 (66)     | +                                                   | ?                                               | ?                                                   | +                                                              | -                                                        | +                                            | +                                                                               | -                     | "39 patients had to be excluded from the analysis presented here because they had received additional metal implants, rendering the measurement of metal ion concentrations meaningless." |
| Hamilton et al. 2010 (67)   | +                                                   | +                                               | ?                                                   | ?                                                              | +                                                        | ?                                            | +                                                                               | +                     |                                                                                                                                                                                           |
| Hanna et al. 2012 (68, 134) | +                                                   | +                                               | +                                                   | ?                                                              | +                                                        | +                                            | +                                                                               | +                     |                                                                                                                                                                                           |
| Howie et al. 2005 (69)      | +                                                   | ?                                               | ?                                                   | ?                                                              | +                                                        | +                                            | ?                                                                               | ?                     |                                                                                                                                                                                           |
| Howie et al. 2012 (70)      | +                                                   | +                                               | ?                                                   | ?                                                              | +                                                        | ?                                            | +                                                                               | +                     |                                                                                                                                                                                           |
| Jacobs et al. 2004 (71)     | ?                                                   | ?                                               | ?                                                   | ?                                                              | -                                                        | +                                            | +                                                                               | -                     | 28% lost to follow up and uneven between groups.                                                                                                                                          |
| Jassim et al. 2015 (72-74)  | +                                                   | +                                               | +                                                   | ?                                                              | +                                                        | ?                                            | ?                                                                               | +                     |                                                                                                                                                                                           |
| Jensen et al. 2011 (75-78)  | +                                                   | +                                               | ?                                                   | ?                                                              | +                                                        | +                                            | +                                                                               | +                     |                                                                                                                                                                                           |
| Kadar et al. 2011 (79-81)   | +                                                   | +                                               | ?                                                   | ?                                                              | ?                                                        | +                                            | +                                                                               | +                     |                                                                                                                                                                                           |
| Kelley et al. 1998 (82)     | ?                                                   | ?                                               | ?                                                   | ?                                                              | ?                                                        | +                                            | +                                                                               | ?                     |                                                                                                                                                                                           |
| Kraay et al. 2006 (83)      | ?                                                   | ?                                               | ?                                                   | ?                                                              | ?                                                        | +                                            | +                                                                               | ?                     |                                                                                                                                                                                           |

| <b>Study</b>                  | <b>Selection bias</b><br>Random sequence generation | <b>Selection bias</b><br>Allocation concealment | <b>Performance bias</b><br>Blinding of participants | <b>Detection bias</b><br>Blinding of primary outcome assessors | <b>Attrition bias</b><br>Incomplete primary outcome data | <b>Reporting bias</b><br>Selective reporting | <b>Other sources of bias</b><br>Funding, baseline characteristics of trial arms | <b>Overall rating</b> | <b>Key reasons for study considered at high risk of bias</b>                                                                      |
|-------------------------------|-----------------------------------------------------|-------------------------------------------------|-----------------------------------------------------|----------------------------------------------------------------|----------------------------------------------------------|----------------------------------------------|---------------------------------------------------------------------------------|-----------------------|-----------------------------------------------------------------------------------------------------------------------------------|
| Langlois et al. 2015 (84)     | +                                                   | ?                                               | ?                                                   | ?                                                              | +                                                        | +                                            | +                                                                               | ?                     |                                                                                                                                   |
| Lavigne et al. 2010 (85)      | +                                                   | +                                               | ?                                                   | ?                                                              | ?                                                        | +                                            | +                                                                               | +                     |                                                                                                                                   |
| Lewis et al. 2008 (86)        | +                                                   | +                                               | ?                                                   | ?                                                              | ?                                                        | +                                            | +                                                                               | ?                     |                                                                                                                                   |
| Lindalen et al. 2015 (87)     | +                                                   | +                                               | ?                                                   | ?                                                              | +                                                        | +                                            | +                                                                               | +                     |                                                                                                                                   |
| Lombardi et al. 2001 (88, 89) | ?                                                   | ?                                               | ?                                                   | ?                                                              | ?                                                        | +                                            | +                                                                               | ?                     |                                                                                                                                   |
| Lombardi et al. 2010 (90)     | +                                                   | ?                                               | ?                                                   | ?                                                              | +                                                        | +                                            | -                                                                               | -                     | Authors reported RCT combined with a group of patients receiving one of the interventions in an initial prospective safety study. |
| MacDonald et al. 2003 (91)    | +                                                   | +                                               | +                                                   | ?                                                              | +                                                        | +                                            | ?                                                                               | +                     |                                                                                                                                   |
| Malviya et al. 2011 (92)      | +                                                   | +                                               | ?                                                   | ?                                                              | +                                                        | +                                            | +                                                                               | +                     |                                                                                                                                   |
| Marston et al. 1996 (93, 94)  | +                                                   | +                                               | ?                                                   | ?                                                              | -                                                        | +                                            | ?                                                                               | -                     | 40% loss to follow up. Attrition given for whole study and not per arm.                                                           |
| Martell et al. 2003 (95)      | ?                                                   | +                                               | ?                                                   | ?                                                              | -                                                        | -                                            | +                                                                               | -                     | Revision not reported by randomised group.                                                                                        |
| McCalden et al. 2009 (96)     | +                                                   | +                                               | +                                                   | ?                                                              | +                                                        | ?                                            | +                                                                               | +                     |                                                                                                                                   |
| Morison et al. 2014 (97)      | +                                                   | +                                               | +                                                   | ?                                                              | +                                                        | +                                            | +                                                                               | +                     |                                                                                                                                   |
| Mutimer et al. 2010 (98)      | ?                                                   | +                                               | +                                                   | +                                                              | +                                                        | ?                                            | ?                                                                               | +                     |                                                                                                                                   |
| Nakahara et al. 2010 (99)     | ?                                                   | ?                                               | ?                                                   | ?                                                              | ?                                                        | ?                                            | +                                                                               | ?                     |                                                                                                                                   |



| <b>Study</b>                    | <b>Selection bias</b><br>Random sequence generation | <b>Selection bias</b><br>Allocation concealment | <b>Performance bias</b><br>Blinding of participants | <b>Detection bias</b><br>Blinding of primary outcome assessors | <b>Attrition bias</b><br>Incomplete primary outcome data | <b>Reporting bias</b><br>Selective reporting | <b>Other sources of bias</b><br>Funding, baseline characteristics of trial arms | <b>Overall rating</b> | <b>Key reasons for study considered at high risk of bias</b>                                                                                                                                                                                                                                  |
|---------------------------------|-----------------------------------------------------|-------------------------------------------------|-----------------------------------------------------|----------------------------------------------------------------|----------------------------------------------------------|----------------------------------------------|---------------------------------------------------------------------------------|-----------------------|-----------------------------------------------------------------------------------------------------------------------------------------------------------------------------------------------------------------------------------------------------------------------------------------------|
| Smolders et al. 2011 (112-114)  | +                                                   | +                                               | ?                                                   | ?                                                              | +                                                        | +                                            | ?                                                                               | ?                     |                                                                                                                                                                                                                                                                                               |
| Tiusanen et al. 2013 (115)      | ?                                                   | ?                                               | ?                                                   | ?                                                              | ?                                                        | +                                            | +                                                                               | ?                     |                                                                                                                                                                                                                                                                                               |
| Triclot et al. 2007 (116)       | +                                                   | +                                               | ?                                                   | ?                                                              | ?                                                        | +                                            | +                                                                               | ?                     |                                                                                                                                                                                                                                                                                               |
| Venditoli et al. 2007 (117-119) | +                                                   | +                                               | +                                                   | ?                                                              | +                                                        | +                                            | ?                                                                               | +                     |                                                                                                                                                                                                                                                                                               |
| von Schewelov et al. 2005 (120) | ?                                                   | ?                                               | ?                                                   | ?                                                              | ?                                                        | ?                                            | ?                                                                               | ?                     |                                                                                                                                                                                                                                                                                               |
| Weissingner et al. 2011 (121)   | ?                                                   | ?                                               | ?                                                   | ?                                                              | ?                                                        | ?                                            | +                                                                               | ?                     |                                                                                                                                                                                                                                                                                               |
| Williams et al. 2007 (122-124)  | ?                                                   | ?                                               | ?                                                   | ?                                                              | ?                                                        | ?                                            | ?                                                                               | ?                     |                                                                                                                                                                                                                                                                                               |
| Zagra et al. 2013 (125, 126)    | +                                                   | ?                                               | ?                                                   | ?                                                              | ?                                                        | +                                            | +                                                                               | ?                     |                                                                                                                                                                                                                                                                                               |
| Zaoui et al. 2015 (127)         | ?                                                   | +                                               | ?                                                   | ?                                                              | +                                                        | +                                            | ?                                                                               | ?                     |                                                                                                                                                                                                                                                                                               |
| Zerahn et al. 2011 (128)        | +                                                   | -                                               | ?                                                   | ?                                                              | +                                                        | +                                            | +                                                                               | -                     | "The patient was excluded from the study if the surgeon found another prosthesis more appropriate during surgery, according to departmental protocols, in which case a new envelope with the same bearing combination as drawn was re-entered into the pool of envelopes for subsequent use." |
| Zhou et al. 2006 (129)          | ?                                                   | ?                                               | ?                                                   | ?                                                              | +                                                        | +                                            | +                                                                               | ?                     |                                                                                                                                                                                                                                                                                               |

| Study                           | <b>Selection bias</b><br>Random sequence generation | <b>Selection bias</b><br>Allocation concealment | <b>Performance bias</b><br>Blinding of participants | <b>Detection bias</b><br>Blinding of primary outcome assessors | <b>Attrition bias</b><br>Incomplete primary outcome data | <b>Reporting bias</b><br>Selective reporting | <b>Other sources of bias</b><br>Funding, baseline characteristics of trial arms | <b>Overall rating</b> | <b>Key reasons for study considered at high risk of bias</b>                   |
|---------------------------------|-----------------------------------------------------|-------------------------------------------------|-----------------------------------------------------|----------------------------------------------------------------|----------------------------------------------------------|----------------------------------------------|---------------------------------------------------------------------------------|-----------------------|--------------------------------------------------------------------------------|
| Zijlstra et al. 2009 (130, 131) | +                                                   | +                                               | ?                                                   | ?                                                              | -                                                        | +                                            | ?                                                                               | -                     | <i>Marked attrition at 10yr follow up, 46% follow up for MoM, 56% for MoP.</i> |
| Zijlstra et al. 2011 (132, 133) | +                                                   | +                                               | ?                                                   | ?                                                              | +                                                        | +                                            | ?                                                                               | ?                     |                                                                                |
