# Supplementary material for: Choice of implant combinations in total hip replacement: systematic review and network meta-analysis
Source: PubMed Central journal article supplement (PMC5683044; doi:10.1136/bmj.j4651), 2017-10-31
Supplement: lopj039521.ww7.pdf [file lopj039521.ww7.pdf]

## Appendix 7: WOMAC and OHS outcomes (studies at high risk of bias excluded)

| <b>Study<br/>Key paper (all<br/>study references)</b> | <b>Group<br/>Bearing combination<br/>Head size<br/>Fixation</b>                                                                              | <b>Outcome measures relevant to review<br/>Follow up times (months)</b>                                         |
|-------------------------------------------------------|----------------------------------------------------------------------------------------------------------------------------------------------|-----------------------------------------------------------------------------------------------------------------|
| Ayers et al. 2009<br>(4)                              | 1. MoP<br>Titanium: UHMWPE<br>28mm<br>Uncemented<br>2. MoP<br>Titanium: HXLPE<br>28mm<br>Uncemented                                          | No significant differences in WOMAC between randomized groups at 6 months, 1 and 2 years (no p values reported) |
| Beaupre et al.<br>2013 (9, 10)                        | 1. CoC<br>Alumina: Alumina<br>32mm<br>Uncemented<br>2. CoP<br>Alumina: HXLPE<br>28mm<br>Uncemented                                           | No differences at 5 years between groups for WOMAC pain (p=0.74), function (p=0.97) or stiffness (p=0.44)       |
| Engh et al. 2009<br>(38, 39)                          | 1. MoP<br>Co-Cr: HXLPE<br>28mm<br>Uncemented<br>2. MoM<br>Co-Cr: Co-Cr<br>28mm<br>Uncemented<br>3. MoM<br>Co-Cr: Co-Cr<br>36mm<br>Uncemented | At 2 years, small head MoM had marginally poorer WOMAC score than MoP group (p=0.052)                           |
| Gauthier et al.<br>2013 (47)                          | 1. MoM<br>Co-Cr-Mo: Co-Cr-Mo<br>36-54<br>Uncemented<br>2. MoP<br>Co-Cr: HXLPE<br>28-32mm<br>Uncemented                                       | No difference in WOMAC domains between groups at 2 years (no p value reported)                                  |
| Girard et al. 2006<br>(50-58)                         | 1. Resurfacing<br>Co-Cr-Mo: Co-Cr-Mo<br>40mm<br>Hybrid<br>2. MoM<br>Co-Cr-Mo: Co-Cr-Mo<br>28mm<br>Uncemented                                 | No difference between groups for WOMAC score at mean 27 months (p=0.409)                                        |
| Glyn-Jones et al.<br>2008 (59-62)                     | 1. MoP<br>Co-Cr: UHMWPE<br>28mm<br>Hybrid<br>2. MoP<br>Co-Cr: HXLPE<br>28mm<br>Hybrid                                                        | No significant difference in OHS between the groups at 10 years (p=0.42)                                        |
| Hanna et al. 2012<br>(68)                             | 1. MoP<br>Co-Cr: UHMWPE<br>28-32mm                                                                                                           | No difference in OHS between groups at 12 or 36 months (p>0.05)                                                 |

|                             |                                                                                                                                                                                         |                                                                                                |
|-----------------------------|-----------------------------------------------------------------------------------------------------------------------------------------------------------------------------------------|------------------------------------------------------------------------------------------------|
|                             | <p>Cemented</p> <hr/> <p>2. MoM<br/>Co-Cr: Co-Cr<br/>44-54mm<br/>Hybrid</p>                                                                                                             |                                                                                                |
| Jassim et al. 2015 (72-74)  | <p>1. MoP<br/>Co-Cr: HXLPE<br/>32mm<br/>Uncemented</p> <hr/> <p>2. CoP<br/>Zirconia: HXLPE<br/>32mm<br/>Uncemented</p> <hr/> <p>3. CoP<br/>Zirconia: UHMWPE<br/>32mm<br/>Uncemented</p> | No difference between groups in WOMAC score at 5 years (p=0.847)                               |
| Jensen et al. 2011* (75-78) | <p>1. Resurfacing<br/>Co-Cr-Mo: Co-Cr-Mo<br/>47-57mm<br/>Hybrid</p> <hr/> <p>2. CoP<br/>Alumina: Unspecified PE<br/>28mm<br/>Uncemented</p>                                             | No significant difference between groups in WOMAC at 2 years (mean difference 1, 95%CI -8, 10) |
| Lavigne et al. 2010* (85)   | <p>1. Resurfacing<br/>Unspecified metal:<br/>Unspecified metal<br/>40mm<br/>Hybrid</p> <hr/> <p>2. MoM<br/>Unspecified metal:<br/>Unspecified metal<br/>40mm<br/>Uncemented</p>         | WOMAC scores similar between groups at 1 year (p>0.05)                                         |
| Lewis et al. 2008 (86)      | <p>1. CoP<br/>Zirconium: Standard PE or<br/>HXLPE<br/>Not stated<br/>Uncemented</p> <hr/> <p>2. MoP<br/>Co-Cr: Standard PE or<br/>HXLPE<br/>Not stated<br/>Uncemented</p>               | No difference between groups in WOMAC score at 1 or 2 years (p>0.159)                          |
| Lindalen et al. 2015 (87)   | <p>1. CoP<br/>Zirconia/ alumina: HXLPE<br/>(vitamin E)<br/>32mm<br/>Uncemented</p> <hr/> <p>2. CoP<br/>Zirconia/ alumina: HXLPE<br/>(vitamin E)<br/>36mm<br/>Uncemented</p>             | OHS similar in groups at 2 years (p=0.72)                                                      |
| MacDonald et al. 2003* (91) | <p>1. MoM<br/>Co-Cr-Mo: Co-Cr-Mo<br/>28mm<br/>Uncemented</p> <hr/> <p>2. MoP<br/>Co-Cr-Mo: UHMWPE<br/>28mm</p>                                                                          | No significant difference in WOMAC score between groups (p>0.05)                               |

|                                       | Uncemented                                                                                                                                                                                                                                              |                                                                                                                          |
|---------------------------------------|---------------------------------------------------------------------------------------------------------------------------------------------------------------------------------------------------------------------------------------------------------|--------------------------------------------------------------------------------------------------------------------------|
| Malviya et al.<br>2011 (92)           | <p>1. MoM<br/>Co-Cr: Unspecified metal<br/>38-54mm<br/>Hybrid</p> <hr/> <p>2. MoP<br/>Unspecified metal:<br/>Unspecified PE<br/>28mm<br/>Hybrid</p>                                                                                                     | No significant difference between groups for WOMAC pain (p=0.296), function (p=0.303) and stiffness (p=0.093) at 2 years |
| McCalden et al.<br>2009* (96)         | <p>1. MoP<br/>Co-Cr: HXLPE<br/>28mm<br/>Hybrid</p> <hr/> <p>2. MoP<br/>Co-Cr: Conventional PE<br/>28mm<br/>Hybrid</p>                                                                                                                                   | At mean 6.8 years no differences between groups for WOMAC score (no p value reported)                                    |
| Morison et al.<br>2014 (97)           | <p>1. MoP<br/>Co-Cr: UHMWPE<br/>28mm<br/>Uncemented</p> <hr/> <p>2. MoP<br/>Co-Cr: HXLPE<br/>28mm<br/>Uncemented</p> <hr/> <p>3. CoP<br/>Zirconium: UHMWPE<br/>28mm<br/>Uncemented</p> <hr/> <p>4. CoP<br/>Zirconium: HXLPE<br/>28mm<br/>Uncemented</p> | No differences between groups for WOMAC scores at 5 years (p>0.423)                                                      |
| Nikolaou et al.<br>2012 (100)         | <p>1. MoP<br/>Co-Cr: UHMWPE<br/>28mm<br/>Uncemented</p> <hr/> <p>2. MoP<br/>Co-Cr: HXLPE<br/>28mm<br/>Uncemented</p> <hr/> <p>3. CoC<br/>Unspecified ceramic:<br/>Unspecified ceramic<br/>28mm<br/>Uncemented</p>                                       | No difference at 5 years in WOMAC pain (p=0.543), function (p=0.102) and stiffness (p=0.99)                              |
| Penny et al.<br>2013* (75-77,<br>103) | <p>1. MoP<br/>Co-Cr: UHMWPE or HXLPE<br/>28mm<br/>Uncemented</p> <hr/> <p>2. MoM<br/>Co-Cr: Co-Cr<br/>47-56mm<br/>Uncemented</p>                                                                                                                        | No difference in WOMAC between groups at 2 years (mean difference -5, 95% CI -11, 2)                                     |
| Schouten et al.<br>2012 (110)         | <p>1. CoM<br/>Zirconia/ alumina: Co-Cr-<br/>Mo<br/>28-36mm<br/>Uncemented</p> <hr/> <p>2. MoM<br/>Co-Cr-Mo: Co-Cr-Mo</p>                                                                                                                                | Comparable improvement in WOMAC (p=0.64) and OHS (p=0.57) between groups at 12 months                                    |

|                                 |                                                          |                                                                                      |
|---------------------------------|----------------------------------------------------------|--------------------------------------------------------------------------------------|
|                                 | 28-36mm<br>Uncemented                                    |                                                                                      |
| Smolders et al. 2011 (112-114)  | 1. Resurfacing<br>Co-Cr: Co-Cr<br>49mm<br>Hybrid         | Better OHS at 24 months in resurfacing group (p=0.04)                                |
|                                 | 2. MoM<br>Co-Cr: Co-Cr<br>28mm<br>Uncemented             |                                                                                      |
| Tiusanen et al. 2013 (115)      | 1. MoP<br>Co-Cr-Mo: Unspecified PE<br>30mm<br>Uncemented | No statistical analysis but OHS similar between groups                               |
|                                 | 2. MoM<br>Co-Cr-Mo: Co-Cr-Mo<br>30mm<br>Uncemented       |                                                                                      |
| Venditoli et al. 2007 (117-119) | 1. CoC<br>Alumina: Alumina<br>32mm<br>Hybrid             | No significant difference in WOMAC scores between groups at mean 79 months (p=0.435) |
|                                 | 2. MoP<br>Stainless steel: UHMWPE<br>28mm<br>Hybrid      |                                                                                      |
| Zhou et al. 2006 (129)          | 1. CoC<br>Alumina: Alumina<br>28mm<br>Hybrid             | No difference in WOMAC between groups at 2 years (no p value reported)               |
|                                 | 2. MoP<br>Co-Cr: HXLPE<br>28mm<br>Hybrid                 |                                                                                      |
| Zijlstra et al. 2011 (132, 133) | 1. MoM<br>Co-Cr: Co-Cr<br>42-56<br>Uncemented            | No difference between groups in OHS at 1 year (p=0.752)                              |
|                                 | 2. MoP<br>Co-Cr: UHMWPE<br>28mm<br>Uncemented            |                                                                                      |
